# Supplementary material for: Characterizing a nonclassical carbene with coupled cluster methods: cyclobutylidene
Source: Royal Society of Chemistry journal article supplement (doi:10.1039/c6cp03513b), 2016-01-01
Supplement: c6cp03513b1.pdf [file c6cp03513b1.pdf]

Supporting Information

**Characterizing a Nonclassical Carbene with Coupled  
Cluster Methods: Cyclobutylidene**

**Xiao Wang**

Center for Computational Quantum Chemistry  
University of Georgia, Athens, GA 30602

**Jay Agarwal**

Center for Computational Quantum Chemistry  
University of Georgia, Athens, GA 30602

**Henry F. Schaefer III\***

Center for Computational Quantum Chemistry  
University of Georgia, Athens, GA 30602  
ccq@uga.edu

# Contents

|          |                                                |           |
|----------|------------------------------------------------|-----------|
| <b>1</b> | <b>Data for Stationary Points</b>              | <b>S1</b> |
| 1.1      | Cyclobutylidene ( $\tilde{X}^1A'$ ) . . . . .  | S1        |
| 1.2      | Cyclobutylidene ( $\tilde{a}^3A_1$ ) . . . . . | S2        |
| 1.3      | TS1 . . . . .                                  | S3        |
| 1.4      | TS2 . . . . .                                  | S4        |
| 1.5      | TS3 . . . . .                                  | S5        |
| 1.6      | P1 (Methylenecyclopropane) . . . . .           | S6        |
| 1.7      | P2 (Cyclobutene) . . . . .                     | S7        |
| 1.8      | P3 (Bicyclo[1.1.0]butane) . . . . .            | S8        |

# 1 Data for Stationary Points

## 1.1 Cyclobutylidene ( $\tilde{X}^1A'$ )

|                                  |                   |               |               |
|----------------------------------|-------------------|---------------|---------------|
| Software:                        | CFour 2.0BETA     |               |               |
| Theory:                          | CCSD(T)/ANO1      |               |               |
| Reference:                       | RHF               |               |               |
| CC Convergence:                  | $10^{-10}$        |               |               |
| SCF Convergence:                 | $10^{-10}$        |               |               |
| Charge:                          | 0                 |               |               |
| Multiplicity:                    | 1                 |               |               |
| Frozen Core:                     | ON                |               |               |
| Geometry Convergence:            | $10^{-5}$ H/bohr  |               |               |
| Total Energy (Hartree):          | -155.594702317326 |               |               |
| Equilibrium Geometry (Angstrom): |                   |               |               |
| C                                | -0.8529669907     | -0.3914546894 | -0.0000000000 |
| C                                | 0.9205660398      | -0.2226172167 | -0.0000000000 |
| C                                | -0.1427918976     | 0.2464763319  | 1.1117865036  |
| C                                | -0.1427918976     | 0.2464763319  | -1.1117865036 |
| H                                | 1.2572111956      | -1.2489650900 | -0.0000000000 |
| H                                | 1.7317189418      | 0.4961681670  | 0.0000000000  |
| H                                | -0.1714568312     | -0.2359267495 | 2.0834656680  |
| H                                | -0.0252546932     | 1.3333982041  | 1.1645348759  |
| H                                | -0.1714568312     | -0.2359267495 | -2.0834656680 |
| H                                | -0.0252546932     | 1.3333982041  | -1.1645348759 |

## 1.2 Cyclobutylidene ( $\tilde{a}^3A_1$ )

|                                  |                   |               |               |
|----------------------------------|-------------------|---------------|---------------|
| Software:                        | CFour 2.0BETA     |               |               |
| Theory:                          | CCSD(T)/ANO1      |               |               |
| Reference:                       | UHF               |               |               |
| CC Convergence:                  | $10^{-10}$        |               |               |
| SCF Convergence:                 | $10^{-10}$        |               |               |
| Charge:                          | 0                 |               |               |
| Multiplicity:                    | 3                 |               |               |
| Frozen Core:                     | ON                |               |               |
| Geometry Convergence:            | $10^{-5}$ H/bohr  |               |               |
| Total Energy (Hartree):          | -155.580921846141 |               |               |
| Equilibrium Geometry (Angstrom): |                   |               |               |
| C                                | -0.0000000000     | 0.0000000000  | 1.0730525334  |
| C                                | -0.0000000000     | -1.1361013673 | 0.0843474297  |
| C                                | -0.0000000000     | 0.0000000000  | -0.9977066363 |
| C                                | 0.0000000000      | 1.1361013673  | 0.0843474297  |
| H                                | 0.8884932100      | -1.7727242571 | 0.0838334081  |
| H                                | -0.8884932100     | -1.7727242571 | 0.0838334081  |
| H                                | -0.8932946627     | 0.0000000000  | -1.6205425325 |
| H                                | 0.8932946627      | 0.0000000000  | -1.6205425325 |
| H                                | 0.8884932100      | 1.7727242571  | 0.0838334081  |
| H                                | -0.8884932100     | 1.7727242571  | 0.0838334081  |

### 1.3 TS1

|                                  |                   |               |               |
|----------------------------------|-------------------|---------------|---------------|
| Software:                        | CFour 2.0BETA     |               |               |
| Theory:                          | CCSD(T)/ANO1      |               |               |
| Reference:                       | RHF               |               |               |
| CC Convergence:                  | $10^{-8}$         |               |               |
| SCF Convergence:                 | $10^{-9}$         |               |               |
| Charge:                          | 0                 |               |               |
| Multiplicity:                    | 1                 |               |               |
| Frozen Core:                     | ON                |               |               |
| Geometry Convergence:            | $10^{-7}$ H/bohr  |               |               |
| Total Energy (Hartree):          | -155.580762660452 |               |               |
| Equilibrium Geometry (Angstrom): |                   |               |               |
| C                                | -0.2056483280     | -0.4775275650 | -0.5747638262 |
| C                                | 0.4311375166      | 0.9126016947  | -0.0377887167 |
| C                                | 1.0245921267      | -0.4886532044 | 0.2326110836  |
| C                                | -1.2833843711     | -0.0855739303 | 0.2028305544  |
| H                                | 0.7674596626      | 1.5843909897  | -0.8174867039 |
| H                                | 0.1697674117      | 1.4062287154  | 0.9003997881  |
| H                                | 1.9452584879      | -0.7192786033 | -0.2918525031 |
| H                                | 1.0327126638      | -0.7393999226 | 1.2977901634  |
| H                                | -2.1163562830     | 0.4440842719  | -0.2529756868 |
| H                                | -1.4023081100     | -0.3191544613 | 1.2729541394  |

## 1.4 TS2

|                                  |                   |               |               |
|----------------------------------|-------------------|---------------|---------------|
| Software:                        | CFour 2.0BETA     |               |               |
| Theory:                          | CCSD(T)/ANO1      |               |               |
| Reference:                       | RHF               |               |               |
| CC Convergence:                  | $10^{-8}$         |               |               |
| SCF Convergence:                 | $10^{-9}$         |               |               |
| Charge:                          | 0                 |               |               |
| Multiplicity:                    | 1                 |               |               |
| Frozen Core:                     | ON                |               |               |
| Geometry Convergence:            | $10^{-7}$ H/bohr  |               |               |
| Total Energy (Hartree):          | -155.577163197415 |               |               |
| Equilibrium Geometry (Angstrom): |                   |               |               |
| C                                | -0.9325570005     | 0.6771482995  | 0.0627240778  |
| C                                | 0.8284503304      | -0.6955444481 | 0.0037014520  |
| C                                | 0.6178603072      | 0.8518225020  | -0.0176156015 |
| C                                | -0.6866393210     | -0.7362102803 | 0.0221073956  |
| H                                | 1.2866497070      | -1.0908740537 | 0.9121658960  |
| H                                | 1.3215154179      | -1.1403833638 | -0.8617302559 |
| H                                | 0.9758962679      | 1.3627278214  | 0.8779835699  |
| H                                | 0.9920774921      | 1.3850949478  | -0.8921389767 |
| H                                | -1.3921666238     | -1.5624166028 | 0.1029618480  |
| H                                | -1.1254520456     | -0.1116838638 | -0.9836425497 |

## 1.5 TS3

|                                  |                   |               |               |
|----------------------------------|-------------------|---------------|---------------|
| Software:                        | CFour 2.0BETA     |               |               |
| Theory:                          | CCSD(T)/ANO1      |               |               |
| Reference:                       | RHF               |               |               |
| CC Convergence:                  | $10^{-8}$         |               |               |
| SCF Convergence:                 | $10^{-9}$         |               |               |
| Charge:                          | 0                 |               |               |
| Multiplicity:                    | 1                 |               |               |
| Frozen Core:                     | ON                |               |               |
| Geometry Convergence:            | $10^{-7}$ H/bohr  |               |               |
| Total Energy (Hartree):          | -155.572068566165 |               |               |
| Equilibrium Geometry (Angstrom): |                   |               |               |
| C                                | 0.0000000053      | -0.8749905381 | -0.4429932408 |
| C                                | -0.0000000000     | 0.8455742839  | -0.2356454283 |
| C                                | 1.0852909586      | -0.0665851561 | 0.3071999292  |
| C                                | -1.0852909586     | -0.0665851614 | 0.3071999239  |
| H                                | -0.0000000000     | 0.3902466253  | -1.3355085154 |
| H                                | -0.0000000265     | 1.9122449662  | -0.4317329363 |
| H                                | 2.0804518607      | -0.0332694848 | -0.1241818662 |
| H                                | 1.0629339448      | -0.1500310636 | 1.3902428899  |
| H                                | -2.0804518607     | -0.0332695006 | -0.1241818662 |
| H                                | -1.0629339395     | -0.1500310689 | 1.3902428846  |

## 1.6 P1 (Methylenecyclopropane)

|                                  |                   |               |               |
|----------------------------------|-------------------|---------------|---------------|
| Software:                        | CFour 2.0BETA     |               |               |
| Theory:                          | CCSD(T)/ANO1      |               |               |
| Reference:                       | RHF               |               |               |
| CC Convergence:                  | $10^{-10}$        |               |               |
| SCF Convergence:                 | $10^{-10}$        |               |               |
| Charge:                          | 0                 |               |               |
| Multiplicity:                    | 1                 |               |               |
| Frozen Core:                     | ON                |               |               |
| Geometry Convergence:            | $10^{-5}$ H/bohr  |               |               |
| Total Energy (Hartree):          | -155.681445080385 |               |               |
| Equilibrium Geometry (Angstrom): |                   |               |               |
| C                                | -0.3063757409     | -0.0000054558 | 0.0000000000  |
| C                                | 0.9440360668      | -0.7722118913 | 0.0000000000  |
| C                                | 0.9440260601      | 0.7722171725  | 0.0000000000  |
| C                                | -1.6320236097     | -0.0000014182 | -0.0000000000 |
| H                                | 1.2453372519      | -1.2692974029 | -0.9142429009 |
| H                                | 1.2453372519      | -1.2692974029 | 0.9142429009  |
| H                                | 1.2453208104      | 1.2693065894  | 0.9142429009  |
| H                                | 1.2453208104      | 1.2693065894  | -0.9142429009 |
| H                                | -2.1909825573     | -0.9282368609 | -0.0000000000 |
| H                                | -2.1909769004     | 0.9282374324  | 0.0000000000  |



## 1.7 P2 (Cyclobutene)

|                                  |                   |               |               |
|----------------------------------|-------------------|---------------|---------------|
| Software:                        | CFour 2.0BETA     |               |               |
| Theory:                          | CCSD(T)/ANO1      |               |               |
| Reference:                       | RHF               |               |               |
| CC Convergence:                  | $10^{-10}$        |               |               |
| SCF Convergence:                 | $10^{-10}$        |               |               |
| Charge:                          | 0                 |               |               |
| Multiplicity:                    | 1                 |               |               |
| Frozen Core:                     | ON                |               |               |
| Geometry Convergence:            | $10^{-5}$ H/bohr  |               |               |
| Total Energy (Hartree):          | -155.694585914811 |               |               |
| Equilibrium Geometry (Angstrom): |                   |               |               |
| C                                | -0.6729464575     | 0.0000000000  | -0.7904844399 |
| C                                | -0.7855006750     | 0.0000000000  | 0.7267886286  |
| C                                | 0.7855006750      | 0.0000000000  | 0.7267886286  |
| C                                | 0.6729464575      | 0.0000000000  | -0.7904844399 |
| H                                | -1.2405906219     | -0.8894931486 | 1.1671770314  |
| H                                | -1.2405906219     | 0.8894931486  | 1.1671770314  |
| H                                | 1.2405906219      | 0.8894931486  | 1.1671770314  |
| H                                | 1.2405906219      | -0.8894931486 | 1.1671770314  |
| H                                | -1.4180911760     | -0.0000000000 | -1.5759389548 |
| H                                | 1.4180911760      | 0.0000000000  | -1.5759389548 |

## 1.8 P3 (Bicyclo[1.1.0]butane)

|                                  |                   |               |               |
|----------------------------------|-------------------|---------------|---------------|
| Software:                        | CFour 2.0BETA     |               |               |
| Theory:                          | CCSD(T)/ANO1      |               |               |
| Reference:                       | RHF               |               |               |
| CC Convergence:                  | $10^{-10}$        |               |               |
| SCF Convergence:                 | $10^{-10}$        |               |               |
| Charge:                          | 0                 |               |               |
| Multiplicity:                    | 1                 |               |               |
| Frozen Core:                     | ON                |               |               |
| Geometry Convergence:            | $10^{-5}$ H/bohr  |               |               |
| Total Energy (Hartree):          | -155.669459413780 |               |               |
| Equilibrium Geometry (Angstrom): |                   |               |               |
| C                                | -0.0000000635     | 0.7486501949  | -0.3186296709 |
| C                                | -0.0000000053     | -0.7486354679 | -0.3186473666 |
| C                                | 1.1341167727      | -0.0000058474 | 0.3163502240  |
| C                                | -1.1341172596     | -0.0000059427 | 0.3163494885  |
| H                                | 0.0000041752      | 1.4197537239  | -1.1593028316 |
| H                                | 0.0000042916      | -1.4197191263 | -1.1593363867 |
| H                                | 2.0797287717      | -0.0000099750 | -0.2151439428 |
| H                                | -2.0797289093     | -0.0000101443 | -0.2151453027 |
| H                                | 1.2187830370      | -0.0000250883 | 1.4017153415  |
| H                                | -1.2187847992     | -0.0000243527 | 1.4017145054  |
